# Supplementary material for: Stereoselective construction of trans-1,2-benzooxadecaline frameworks by three-component cascade reactions of an α-phenethyl-β-borylallylsilane with aldehydes
Source: Royal Society of Chemistry journal article supplement (doi:10.1039/b102613p), 2001-01-01
Supplement: b102613p.doc [file b102613p.doc]

**Supplementary** **data**

**Stereoselective construction of *trans*-1,2-benzooxadecaline frameworks by three-component cascade reactions of an** ****-phenethyl-******-borylallylsilane with aldehydes**

Michinori Suginome,* Yutaka Ohmori, and Yoshihiko Ito*

*Department of Synthetic Chemistry and Biological Chemistry, Graduate School of Engineering, Kyoto University, Kyoto 606-8501, Japan*

# Experimental Procedures and Spectral Data

**General.** All reactions using Lewis acids were performed under a nitrogen atmosphere with magnetic stirring. Column chromatography was performed with Cosmosil 140C18-OPN (silica gel endcapped with ODS, Nacalai) or Wakogel C-200 (silica gel, 75-150 **m, Wako). 1H and 13C NMR spectra were recorded on a Varian Gemini 2000 (1H at 200.01 MHz and 13C at 75.46 MHz) spectrometer using the solvent as internal standard. High resolution mass spectra were recorded on a JEOL JMS-HX110A (FAB) or a JEOL JMS-SX102A (EI) spectrometer. Infrared spectra were recorded on a Hitachi 270-30 spectrometer. A general procedure for the synthesis of **2** is given in the footnote of the main text.

**2ab:** 1H NMR (CDCl3) ** 0.99 (t, J = 7.5 Hz, 3H), 1.09 (s, 12H), 1.20-1.31 (m, 2H), 1.23 (d, J = 6.0 Hz, 3H), 1.48-1.66 (m, 2H), 1.78 (dq, J = 5.4, 12.9 Hz, 1H), 2.11 (tt, J = 8.4, 12.9 Hz, 1H), 2.60 (dd, J = 1.8, 12.3 Hz, 1H), 2.86 (dd, J = 5.4, 8.4 Hz, 1H), 3.46 (ddt, J = 1.8, 6.3, 11.1 Hz, 1H), 3.57 (dq, J = 6.0, 9.6 Hz, 1H), 7.03-7.13 (m, 3H), 7.26 (d, J = 7.5 Hz, 1H); 13C NMR (CDCl3) ** 10.1, 19.8, 21.4, 24.3, 24.4, 28.7, 29.5, 33.7 (br), 40.9, 48.1, 76.0, 77.7, 82.9, 125.0, 125.3, 125.7, 128.8, 136.8, 141.8; IR (KBr) 2984, 1306, 1140, 856 cm-1. HRMS Calcd for C22H33BO3 (M+): 356.2523. Found: 356.2511.

**2ac:** 1H NMR (CDCl3) ** 0.83 (d, J = 6.9 Hz, 3H), 0.97 (t, J = 7.5 Hz, 3H), 1.02 (d, J = 6.9 Hz, 3H), 1.09 (s, 12H), 1.15-1.23 (m, 1H), 1.42 (ddd, J = 3.9, 9.6, 12.6 Hz, 1H), 1.48-1.57 (m, 2H), 1.70-1.79 (m, 1H), 1.97 (dsept, J = 2.4, 6.9 Hz, 1H), 2.08 (tt, J = 8.7, 12.6 Hz, 1H), 2.53 (dd, J = 2.1, 12.3 Hz, 1H), 2.82-2.87 (m, 2H), 3.23 (dd, J = 2.1, 9.6 Hz, 1H), 3.36 (ddt, J = 2.1, 6.3, 11.4 Hz, 1H), 7.03-7.13 (m, 3H), 7.26 (d, J = 7.5 Hz, 1H); 13C NMR (CDCl3) ** 10.1, 14.3, 20.4, 20.5, 24.2, 24.5, 28.6, 28.7, 29.6, 33.6 (br), 41.2, 43.5, 77.4, 82.9, 83.0, 124.9, 125.3, 125.8, 128.8, 136.9, 142.4; IR (KBr) 2976, 1312, 1140, 858 cm-1. HRMS Calcd for C24H37BO3 (M+): 384.2836. Found: 384.2837.

**2ad:** 1H NMR (CDCl3) ** 0.97 (t, J = 7.5 Hz, 3H), 1.01 (s, 9H), 1.10 (s, 6H), 1.11 (s, 6H), 1.16-1.24 (m, 1H), 1.45-1.59 (m, 3H), 1.99-2.08 (m, 1H), 2.23 (tt, J = 8.4, 12.6 Hz, 1H), 2.50 (dd, J = 1.8, 12.3 Hz, 1H), 2.81 (dd, J = 4.8, 8.4 Hz, 2H), 2.97 (d, J = 9.0 Hz, 1H), 3.38 (ddt, J = 1.8, 6.3, 11.4 Hz, 1H), 7.02-7.11 (m, 3H), 7.25 (d, J = 7.5 Hz, 1H); 13C NMR (CDCl3) ** 10.4, 22.6, 24.1, 24.7, 27.5, 29.3, 29.6, 34.8 (br), 35.4, 42.2, 45.6, 78.3, 82.9, 87.1, 124.8, 125.3, 126.2, 128.7, 136.6, 142.1; IR (KBr) 2980, 1316, 1142, 856 cm-1. HRMS Calcd for C25H39BO3 (M+): 398.2992. Found: 398.2992.

**2ae:** 1H NMR (CDCl3) ** 1.01 (t, J = 7.5 Hz, 3H), 1.16 (s, 12H), 1.16-1.22 (m, 1H), 1.44 (t, J = 12.0 Hz, 1H), 1.59-1.75 (m, 3H), 2.04-2.18 (m, 1H), 2.61-2.80 (m, 3H), 3.64-3.73 (m, 1H), 4.44 (d, J = 9.9 Hz, 1H), 7.00-7.16 (m, 3H), 7.26-7.38 (m, 6H); 13C NMR (CDCl3) ** 9.7, 21.4, 24.3, 24.6, 28.6, 29.3, 34.0 (br), 40.5, 47.9, 77.9, 83.1, 83.5, 125.0, 125.3, 125.8, 127.49, 127.53, 128.1, 128.9, 137.0, 141.6, 141.9; IR (KBr) 2984, 1318, 1136, 700 cm-1. HRMS Calcd for C27H35BO3 (M+): 418.2679. Found: 418.2680.

**2af:** 1H NMR (CD2Cl2) ** 0.93 (t, J = 7.5 Hz, 3H), 0.96 (t, J = 7.5 Hz, 3H), 1.11 (s, 12H), 1.11-1.32 (m, 2H), 1.40-1.62 (m, 4H), 1.66-1.76 (m, 1H), 1.92-2.09 (m, 3H), 2.55 (dd, J = 1.8, 12.6 Hz, 1H), 2.80 (dd, J = 5.7, 8.7 Hz, 2H), 3.54 (ddt, J = 1.8, 6.0, 11.1 Hz, 1H), 3.88 (dd, J = 8.1, 9.6 Hz, 1H), 5.39 (ddt, J = 1.5, 8.1, 15.3 Hz, 1H), 5.70 (dt, J = 6.6, 15.3 Hz, 1H), 7.02-7.11 (m, 3H), 7.22 (d, J = 7.5 Hz, 1H); 13C NMR (CD2Cl2) ** 9.4, 13.2, 21.4, 22.1, 23.8, 23.9, 28.3, 29.2, 33.1 (br), 34.2, 40.3, 46.0, 76.6, 81.1, 82.8, 124.6, 124.9, 125.2, 128.5, 130.3, 133.4, 136.7, 142.1; IR (KBr) 2936, 1320, 1142, 970 cm-1. HRMS Calcd for C26H39BO3 (M+): 410.2992. Found: 410.2996.

**2ba:** 1H NMR (CDCl3) ** 0.97 (t, J = 7.5 Hz, 3H), 1.08 (s, 12H), 1.21-1.51 (m, 3H), 1.26 (d, J = 6.0 Hz, 3H), 1.72-1.84 (m, 2H), 2.10 (tt, J = 8.4, 12.6 Hz, 1H), 2.56 (dd, J = 2.1, 12.6 Hz, 1H), 2.83-2.87 (m, 2H), 3.35 (ddd, J = 3.0, 7.5, 9.6 Hz, 1H), 3.69 (ddq, J = 2.1, 6.0, 11.1 Hz, 1H), 7.03-7.12 (m, 3H), 7.23 (d, J = 7.5 Hz, 1H); 13C NMR (CDCl3) ** 9.4, 21.0, 22.4, 24.2, 24.5, 25.7, 28.7, 33.9 (br), 43.3, 45.3, 72.2, 80.6, 82.9, 125.0, 125.3, 125.7, 128.8, 136.8, 141.9; IR (KBr) 2984, 1314, 1142, 856 cm-1. HRMS Calcd for C22H33BO3 (M+): 356.2523. Found: 356.2520.

**2ca:** 1H NMR (CDCl3) ** 0.96 (d, J = 6.6 Hz, 3H), 0.97 (t, J = 7.5 Hz, 3H), 0.99 (d, J = 6.6 Hz, 3H), 1.08 (s, 6H), 1.09 (s, 6H), 1.18-1.46 (m, 3H), 1.66-1.84 (m, 3H), 2.08 (tt, J = 8.4, 12.6 Hz, 1H), 2.61 (dd, J = 1.5, 12.3 Hz, 1H), 2.84 (dd, J = 5.7, 8.4 Hz, 2H), 3.17 (ddd, J = 1.5, 6.6, 11.4 Hz, 1H), 3.32 (ddd, J = 3.0, 8.4, 9.6 Hz, 1H), 7.02-7.13 (m, 3H), 7.28 (d, J = 7.8 Hz, 1H); 13C NMR (CDCl3) ** 9.5, 18.7, 18.9, 21.1, 24.4, 25.9, 28.6, 33.5, 33.6 (br), 38.1, 45.8, 80.6, 81.3, 82.9, 124.9, 125.3, 125.7, 128.7, 136.9, 142.4; IR (KBr) 2984, 1312, 1138, 856 cm-1. HRMS Calcd for C24H37BO3 (M+): 384.2836. Found: 384.2835.

**2,3-Bis-(dimethylphenylsilyl)-5-phenyl-1-pentene (5).** To a mixture of Pd(acac)2 (9.0 mg, 30  10-3 mmol) and 1,1,3,3-tetramethylbutyl isocyanide (31 mg, 0.22 mmol) in toluene (2.0 mL) were added 1,2-diphenyltetramethyldisilane (400 mg, 1.5 mmol) and 5-phenyl-1,2-pentadiene (320 mg, 2.2 mmol) at room temperature. The mixture was stirred under reflux for 2 h. Evaporation of the solvent followed by silica gel column chromatography (hexane:EtOAc = 100/1) afforded **5** (490 mg, 80%).  1H NMR (CDCl3) ** 0.15 (s, 3H), 0.28 (s, 6H), 0.29 (s, 3H), 1.76-1.88 (m, 2H), 1.98 (dd, J = 3.9, 11.2 Hz, 1H), 2.11 (ddd, J = 5.7, 10.5, 13.5 Hz, 1H), 2.53 (ddd, J = 5.7, 11.2, 13.5 Hz, 1H), 5.56 (d, J = 2.1 Hz, 1H), 5.67 (d, J = 2.1 Hz, 1H), 6.95-6.98 (m, 2H), 7.12-7.25 (m, 3H), 7.30-7.40 (m, 6H), 7.42-7.45 (m, 2H), 7.50-7.53 (m, 2H); 13C NMR (CDCl3) ** -4.9, -3.4, -3.3, -2.8, 32.6, 34.0, 35.6, 124.6, 125.5, 127.6, 127.7, 128.2, 128.3, 128.9, 129.0, 134.25, 134.34, 138.2, 138.7, 143.0, 152.4; IR (neat) 2968, 1430, 1250, 1112, 834 cm-1. HRMS Calcd for C27H34Si2 (M+): 414.2199. Found: 414.2200.

**3-(Dimethylphenylsilyl)-2-methyl-5-phenyl-1-pentene (6).** A mixture of PdCl2(PPh3)2 (242 mg, 0.344 mmol), MeI (489 mg, 3.44 mmol), **1** (734 mg, 1.81 mmol), H2O (6 mL), and Ba(OH)2•8H2O (1.63 g, 5.16 mmol) in DME (18 mL) was heated under reflux with stirring for 9 h. Extractive work-up followed by silica gel column chromatography (hexane) afforded **6** (254 mg, 48%) and recovered **1** (180 mg, 25%). 1H NMR (CDCl3) ** 0.26 (s, 3H), 0.31 (s, 3H), 1.61 (dd, J = 0.9, 1.5 Hz, 3H), 1.72-1.85 (m, 3H), 2.35-2.46 (m, 1H), 2.68-2.77 (m, 1H), 4.59 (dd, J = 0.9, 1.5 Hz, 1H), 4.82 (quint, J = 1.5 Hz, 1H), 7.09-7.39 (m, 8H), 7.46-7.49 (m, 2H); 13C NMR (CDCl3) ** -4.9, -3.9, 23.9, 30.5, 35.1, 37.0, 109.4, 125.6, 127.7, 128.3, 128.6, 129.0, 134.0, 138.3, 142.7, 146.0; IR (neat) 2944, 1641, 1250, 1114, 700 cm-1. HRMS Calcd for C20H26Si (M+): 294.1804. Found: 294.1806.

**8:** To a mixture of **6** (28.8 mg, 98  10-3 mmol) and propionaldehyde (17 mg, 0.29 mmol) in CH2Cl2 (98  10-3 mL) was added TMSOTf (65 mg, 0.29 mmol) at –78 °C. The mixture was stirred at –78–0 °C for 3 h. The reaction was quenched with NaHCO3 aq (saturated) at –78 °C. Extractive work-up followed by column chromatography on silica gel (hexane:EtOAc = 100/1) afforded **8** (10.3 mg, 42%) as a mixture of two diastereomers. The isomers were separated by HPLC on silica gel (hexane:EtOAc = 100/1). 1H NMR (CDCl3) ** 0.99 (t, J = 7.5 Hz, 3H), 1.00 (t, J = 7.5 Hz, 3H), 1.19 (s, 3H), 1.34-1.63 (m, 6H), 1.68-1.84 (m, 2H), 2.11 (dd, J = 2.1, 12.6 Hz, 1H), 2.88-2.93 (m, 2H), 3.34 (dt, J = 3.0, 9.0 Hz, 1H), 3.59 (dddd, J = 2.1, 5.1, 6.9, 11.7 Hz, 1H), 7.05-7.23 (m, 4H); 13C NMR (CDCl3) ** 9.7, 10.2, 19.1, 22.6, 26.0, 27.9, 29.6, 35.8, 43.5, 44.9, 73.9, 76.9, 123.8, 125.6, 129.2, 135.1, 147.7; IR (neat) 2944, 1454, 1060, 760 cm-1. HRMS Calcd for C18H26O (M+): 258.1984. Found: 258.1979.

**9:** To a mixture of **1** (49 mg, 0.12 mmol) and 1,1,3,3-tetramethoxypropane (24 mg, 0.14 mmol) in CH2Cl2 (0.12 mL) was added TiCl4 (2.0 M in CH2Cl2, 0.135 mL, 0.27 mmol) at –78 °C. The mixture was stirred at –78–0 °C for 3 h. Extractive work-up followed by column chromatography on Cosmosil (hexane:EtOAc = 50/1–30/1) afforded **9** (36 mg, 81%)  1H NMR (CDCl3) ** 0.91 (s, 6H), 1.10 (s, 6H), 1.23 (ddd, J = 2.7, 10.8, 13.8 Hz, 1H), 1.31 (dd, J = 2.7, 13.8 Hz, 1H), 1.42 (dt, J = 4.8, 10.8 Hz, 1H), 2.16-2.25 (m, 2H), 2.37-2.46 (m, 1H), 2.83 (t, J = 6.9 Hz, 2H), 2.91 (dt, J = 2.7, 13.8 Hz, 1H), 3.40 (s, 3H), 3.42 (s, 3H), 3.57 (dt, J = 4.2, 10.8 Hz, 1H), 3.70 (quint, J = 2.7 Hz, 1H), 7.00-7.11 (m, 3H), 7.43 (d, J = 7.8 Hz, 1H); 13C NMR (CDCl3) ** 20.5, 23.5, 24.8, 29.6, 31.8 (br), 36.1, 38.1, 49.0, 56.6, 56.7, 76.8, 77.1, 82.6, 124.8, 124.9, 127.9, 128.8, 137.4, 141.7; IR (KBr) 2988, 1346, 1148, 1098 cm-1. HRFABMS Calcd for C22H34BO4 (M+1): 373.2550. Found: 373.2549.

**10:** A mixture of **2aa** (30 mg, 82  10-3 mmol) and trimethylamine oxide dihydrate (9.9 mg, 89  10-3 mmol) in diglyme (0.20 mL) was stirred at 160 °C for 6h. In the course of the reaction, additional trimethylamine oxide dihydrate was added (9.9 mg @ 2h, 5.0 mg @ 5h). Extractive work-up followed by column chromatography on silica gel (hexane:EtOAc = 19/1) afforded **10** (18 mg, 85%). 1H NMR (CDCl3) ** 1.01 (t, J = 7.5 Hz, 3H), 1.02 (t, J = 7.5 Hz, 3H), 1.34-1.82 (m, 9H), 2.41 (dd, J = 2.1, 13.2 Hz, 1H), 2.79-2.98 (m, 2H), 3.56 (dt, J = 3.0, 9.3 Hz, 1H), 3.79 (dddd, J = 2.1, 5.1, 7.5, 13.2 Hz, 1H), 7.12-7.24 (m, 3H), 7.44-7.49 (m, 1H); 13C NMR (CDCl3) ** 9.7, 10.1, 18.7, 25.7, 28.9, 29.2, 42.1, 46.1, 68.9, 73.8, 76.5, 124.5, 126.3, 127.9, 129.6, 136.5, 141.3; IR (KBr) 3500, 2968, 1052, 772 cm-1.

**11:** To a solution of **2aa** (30 mg, 80 mmol) in THF (0.20 mL) and *t*-BuOH (0.2 mL) was introduced ammonia (ca. 5 mL) at –78 °C. Li (6.3 mg)was added, and the mixture was stirred at –33 °C for 1 h. After MeOH and H2O were added, ammonia was evaporated by warming the reaction mixture to room temperature. The procedure was repeated one more time to achieve complete conversion. Extractive work-up followed by column chromatography on Cosmosil (hexane:EtOAc = 700/1) afforded **11** (29 mg, 98%). 1H NMR (CDCl3) ** 0.93 (t, J = 7.5 Hz, 3H), 0.94 (t, J = 7.5 Hz, 3H), 1.17 (s, 6H), 1.18 (s, 6H), 1.18-1.80 (m, 7H), 1.84-2.07 (m, 3H), 2.13 (dd, J = 1.8, 12.6 Hz, 1H), 2.44-2.78 (m, 4H), 3.15-3.25 (m, 2H), 5.63-5.72 (m, 2H); 13C NMR (CDCl3) ** 9.6, 10.2, 20.5, 24.4, 24.6, 25.7, 26.1, 29.6, 30.1, 32.2, 34.1 (br), 39.0, 46.7, 77.9, 80.5, 82.6, 123.6, 125.0, 126.3, 128.0; IR (KBr) 2936, 1466, 1374, 1142 cm-1. HRMS Calcd for C23H37BO3 (M+): 372.2836. Found: 372.2846.

**12:** A mixture of **11** (20.3 mg, 55  10-3 mmol), NaOH aq. (3 M, 0.358 mL, 1.07 mmol), and hydrogen peroxide (30%, 122 mg, 1.07 mmol) in THF (0.5 mL) was heated at 50 °C for 4 h. In the course of the reaction, a mixture of NaOH aq. (3 M, 0.358 mL, 1.07 mmol) and hydrogen peroxide (30%, 122 mg, 1.07 mmol) in THF (1 mL) was added twice at 1 h and 2.5 h. The mixture was quenched with Na2S2O3 aq. at room temperature. Extractive work-up followed by silica gel column chromatography (hexane:EtOAc = 50/1 – 9/1) gave **12** (13.2 mg, 92%). 1H NMR (CDCl3) ** 0.96 (t, J = 7.5 Hz, 3H), 0.98 (t, J = 7.5 Hz, 3H), 1.11-1.75 (m, 9H), 1.86-2.10 (m, 2H), 1.88 (dd, J = 2.1, 13.2 Hz, 1H), 2.46-2.90 (m, 4H), 3.47 (dt, J = 2.7, 9.0 Hz, 1H), 3.64 (dddd, J = 2.1, 5.1, 7.5, 12.9 Hz, 1H), 5.63-5.70 (m, 1H), 5.74-5.81 (m, 1H); 13C NMR (CDCl3) ** 9.6, 10.2, 20.5, 24.4, 24.6, 25.7, 26.1, 29.6, 30.1, 32.2, 34.1 (br), 39.0, 46.7, 77.9, 80.5, 82.6, 123.6, 125.0, 126.3, 128.0; IR (KBr) 3512, 2968, 1048, 688 cm-1. Anal. Calcd for C17H26O2: C, 77.82; H, 9.99. Found: C, 77.52; H, 9.89.

**13**: To a solution of **10** (18 mg, 69  10-3 mmol)) in THF (0.50 mL) and *t*-BuOH (0.2 mL) was introduced ammonia (ca. 5 mL) at –78 °C. Li (11 mg)was added, and the mixture was stirred at –33 °C for 2 h. After MeOH and H2O were added, ammonia was evaporated by warming the reaction mixture to room temperature. Extractive work-up followed by column chromatography on silica gel (hexane:EtOAc = 50/1) afforded **13** (15 mg, 91%, a 1:1 mixture of stereoisomers). The isomers were separated by HPLC (silica gel). Spectral data for one isomer: 1H NMR (CDCl3) ** 0.96 (t, J = 7.5 Hz, 3H), 0.97 (t, J = 7.5 Hz, 3H), 1.14-1.61 (m, 6H), 1.69-2.15 (m, 6H), 2.42-2.75 (m, 4H), 2.99 (dt, J = 2.7, 9.3 Hz, 1H), 3.23 (dddd, J = 2.1, 5.4, 7.2, 12.9 Hz, 1H), 5.68-5.77 (m, 2H); 13C NMR (CDCl3) ** 9.8, 10.2, 24.0, 25.5, 27.1, 29.4, 30.4. 31.7, 35.2, 42.4, 43.9, 78.9, 82.2, 124.1, 124.5, 125.7, 127.1; IR (neat) 2948, 1464, 1088, 666 cm-1. HRMS Calcd for C17H26O (M+): 246.1984. Found: 246.1980. Spectral data for another diastereomer: 1H NMR (CDCl3) ** 0.92 (t, J = 7.5 Hz, 3H), 0.98 (t, J = 7.5 Hz, 3H), 1.25-1.94 (m, 11H), 2.42-2.75 (m, 5H), 3.05 (dddd, J = 1.8, 5.4, 7.5, 12.9 Hz, 1H), 3.36 (dt, J = 2.7, 9.6 Hz, 1H), 5.69-5.78 (m, 2H); 13C NMR (CDCl3) ** 10.0, 10.1, 24.5,26.3, 26.7, 28.1, 29.2, 31.9, 33.7, 36.9, 38.7, 74.6, 76.4, 124.2, 124.6, 125.8, 127.3; IR (neat) 2932, 1464, 1108, 668 cm-1. HRMS Calcd for C17H26O (M+): 246.1984. Found: 246.1987.
